# Supplementary material
Source: PubMed Central journal article supplement (PMC5754923)
Supplement: NIHMS929224-supplement-Supplemental.pdf [file NIHMS929224-supplement-Supplemental.pdf]

Supporting information for

# Phosphinophosphonates and their tris-pivaloyloxymethyl prodrugs reveal a negatively cooperative butyrophilin activation mechanism

Rebekah R. Shippy,<sup>1</sup> Xiaochen Lin,<sup>2</sup> Sherry S. Agabiti,<sup>2</sup> Jin Li,<sup>2</sup> Brendan M. Zangari,<sup>2</sup> Benjamin J. Foust,<sup>1</sup> Michael M. Poe,<sup>2</sup> Chia-Hung Christine Hsiao,<sup>2</sup> Olga Vinogradova,<sup>2</sup> David F. Wiemer,<sup>1</sup> and Andrew J. Wiemer<sup>2,3\*</sup>

*<sup>1</sup>Department of Chemistry, University of Iowa, Iowa City, IA 52242, USA*

*<sup>2</sup>Department of Pharmaceutical Sciences, University of Connecticut, Storrs, CT 06269, USA*

*<sup>3</sup>Institute for Systems Genomics, University of Connecticut, Storrs, CT 06269, USA*

[david-wiemer@uiowa.edu](mailto:david-wiemer@uiowa.edu) or [andrew.wiemer@uconn.edu](mailto:andrew.wiemer@uconn.edu)

## Supplemental Table of Contents

|                                                              |     |
|--------------------------------------------------------------|-----|
| <sup>1</sup> H NMR spectrum of compound <b>4</b> (300 MHz)   | S3  |
| <sup>13</sup> C NMR spectrum of compound <b>4</b> (75 MHz)   | S4  |
| <sup>1</sup> H NMR spectrum of compound <b>7</b> (300 MHz)   | S5  |
| <sup>13</sup> C NMR spectrum of compound <b>7</b> (75 MHz)   | S6  |
| <sup>1</sup> H NMR spectrum of compound <b>8</b> (400 MHz)   | S7  |
| <sup>13</sup> C NMR spectrum of compound <b>8</b> (100 MHz)  | S8  |
| <sup>1</sup> H NMR spectrum of compound <b>9</b> (400 MHz)   | S9  |
| <sup>13</sup> C NMR spectrum of compound <b>9</b> (100 MHz)  | S10 |
| <sup>1</sup> H NMR spectrum of compound <b>10</b> (400 MHz)  | S11 |
| <sup>13</sup> C NMR spectrum of compound <b>10</b> (125 MHz) | S12 |
| <sup>1</sup> H NMR spectrum of compound <b>11</b> (300 MHz)  | S13 |
| <sup>13</sup> C NMR spectrum of compound <b>11</b> (75 MHz)  | S14 |

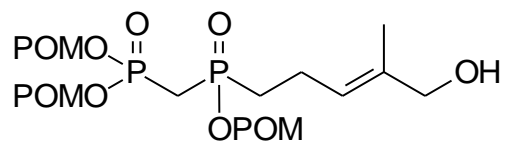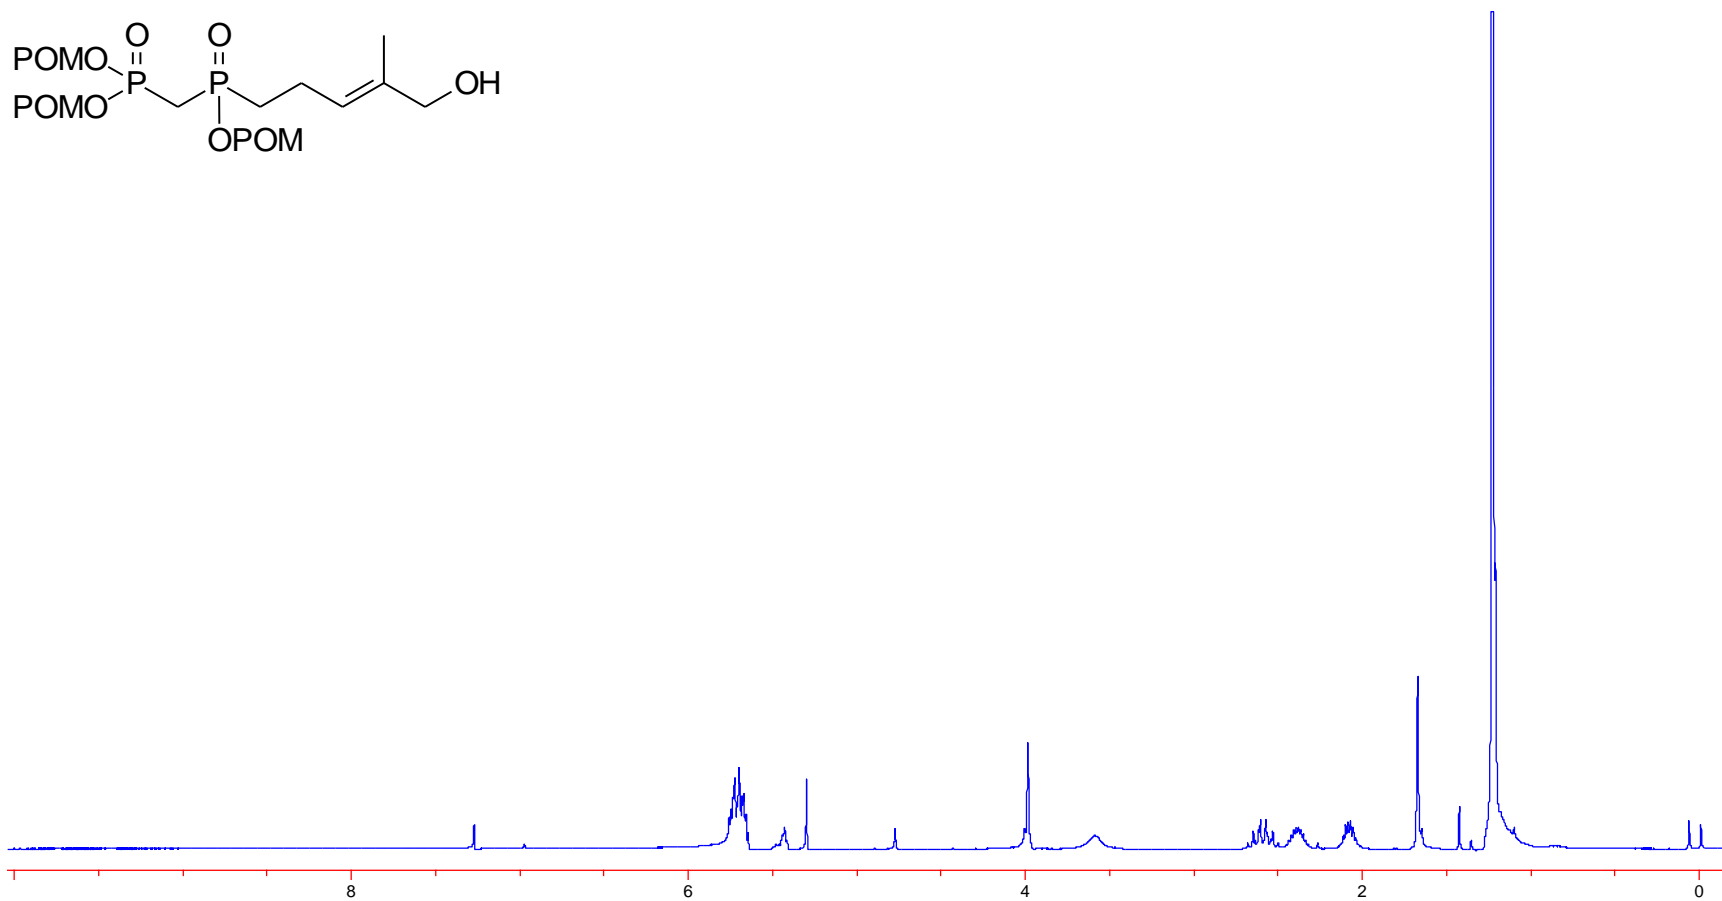

<sup>1</sup>H NMR spectrum of compound **4** (300 MHz).

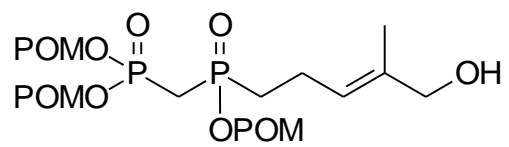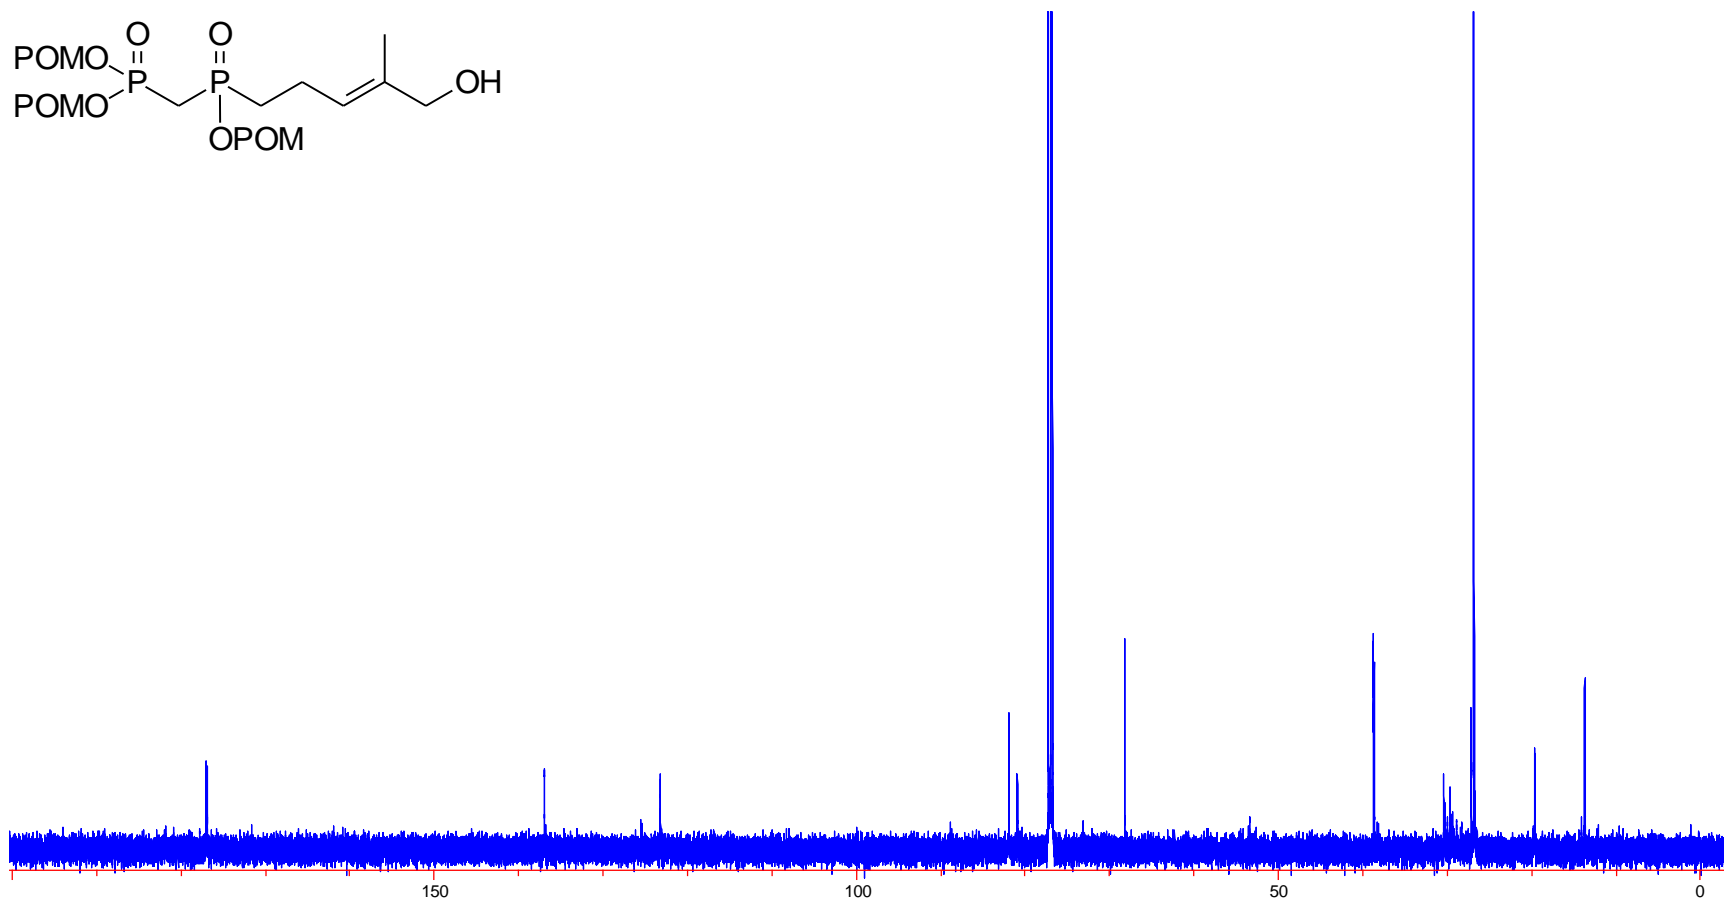

<sup>13</sup>C NMR spectrum of compound 4 (75 MHz).

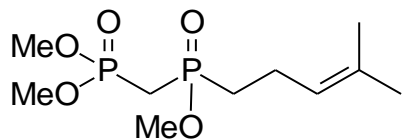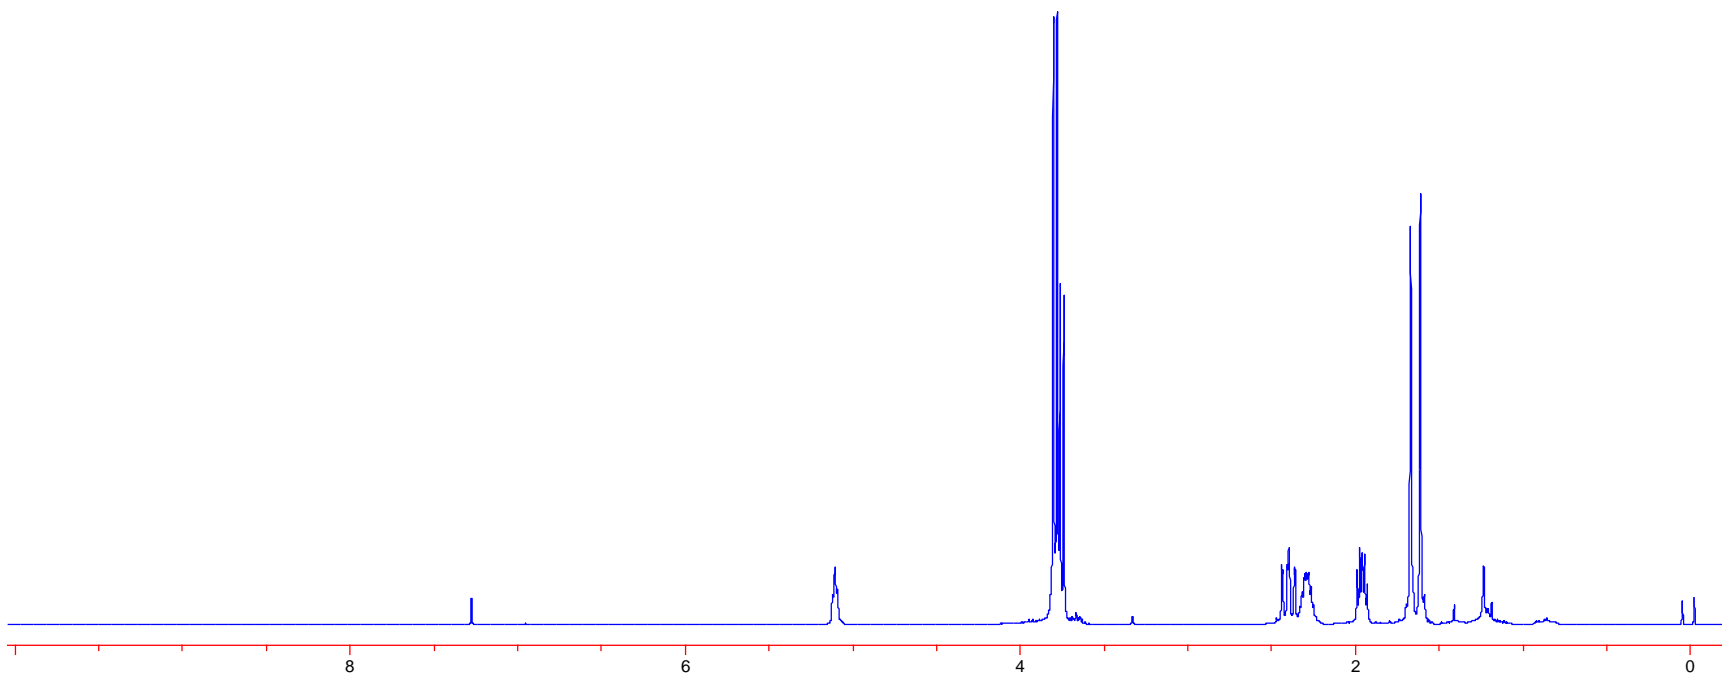

$^1\text{H}$  NMR spectrum of compound 7 (300 MHz).

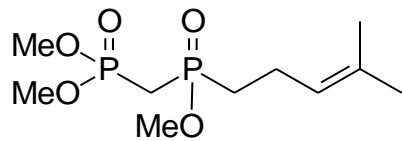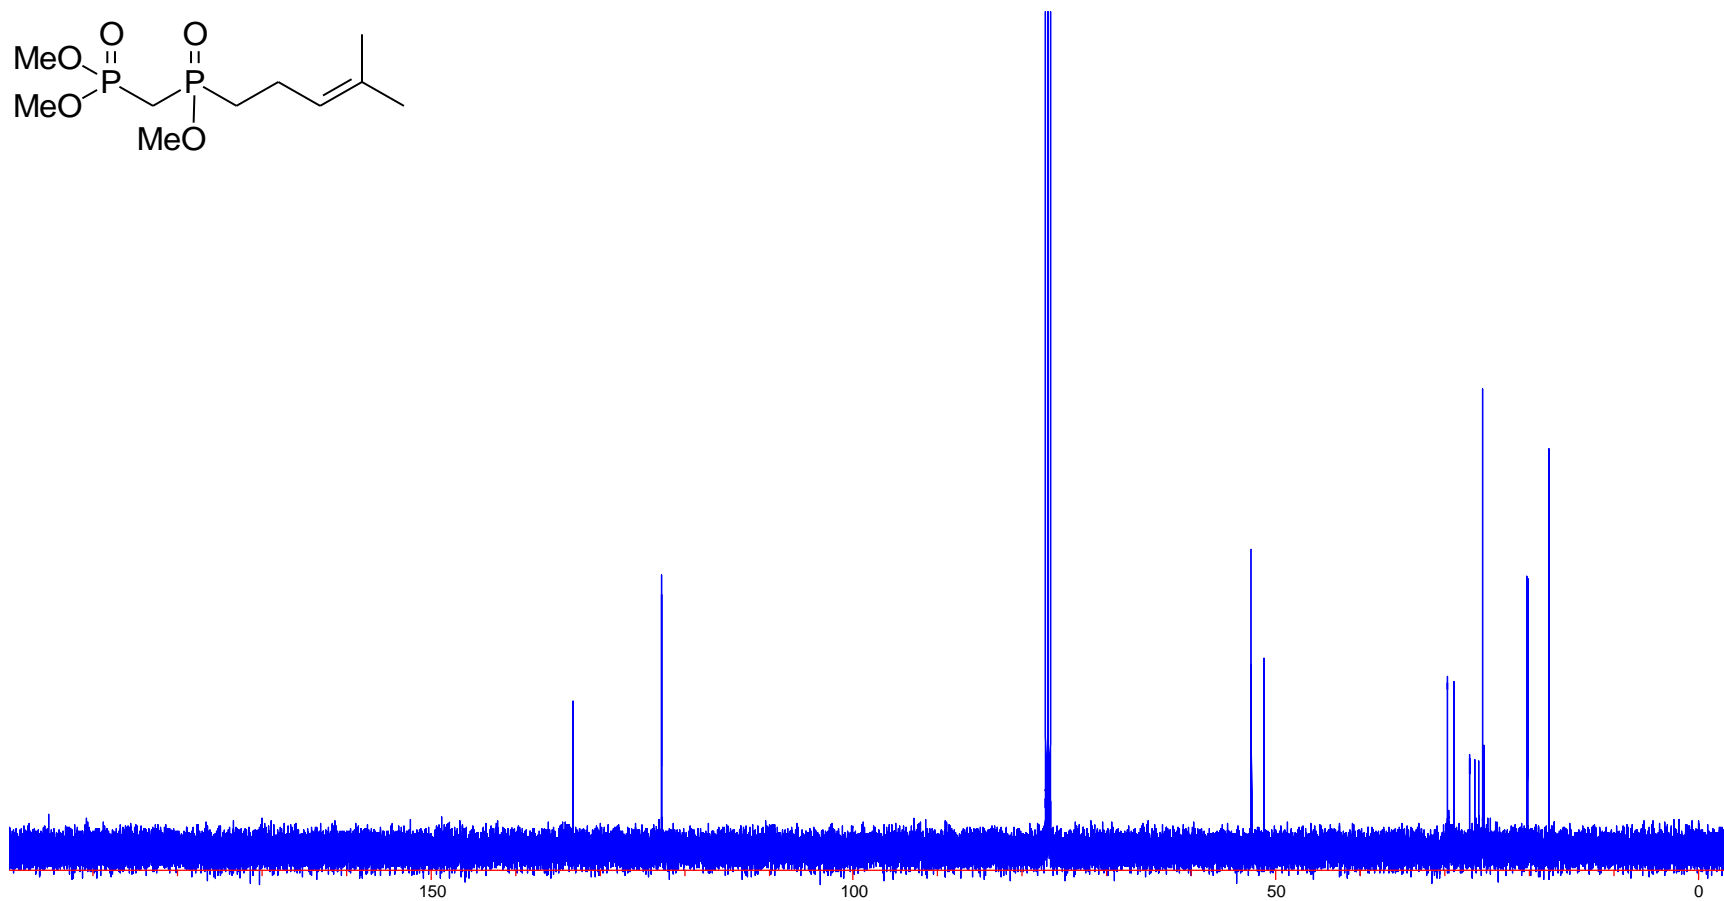

<sup>13</sup>C NMR spectrum of compound 7 (75 MHz).

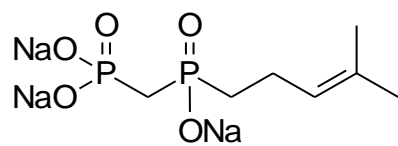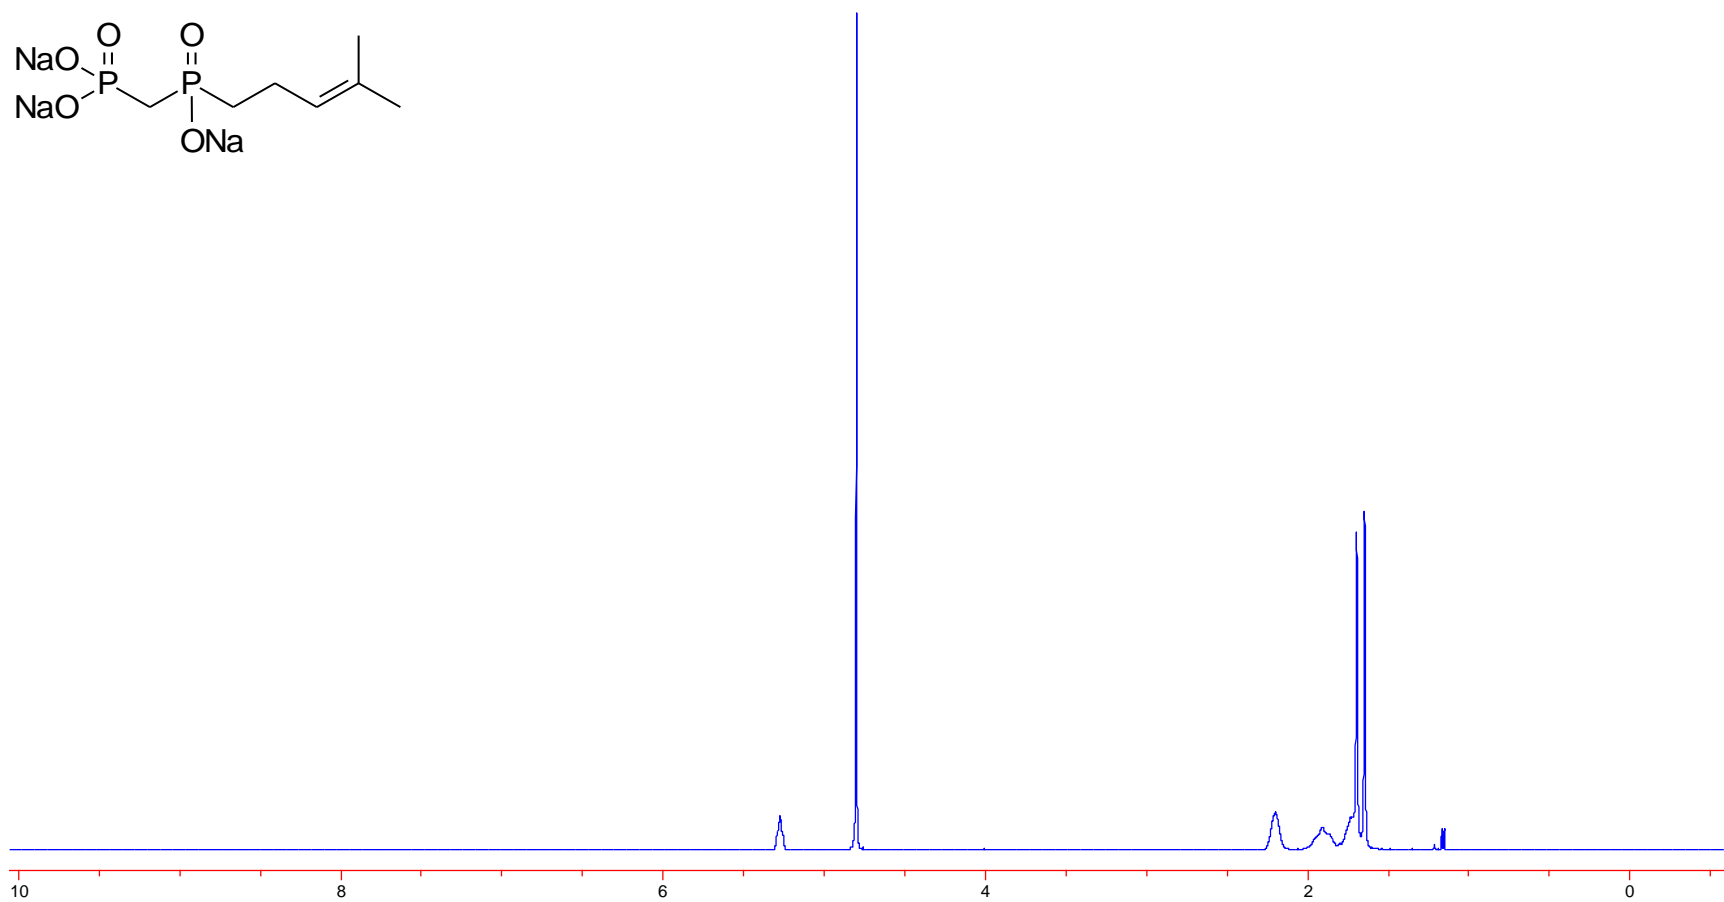

$^1\text{H}$  NMR spectrum of compound **8** (400 MHz).

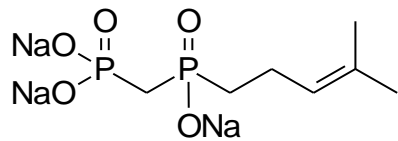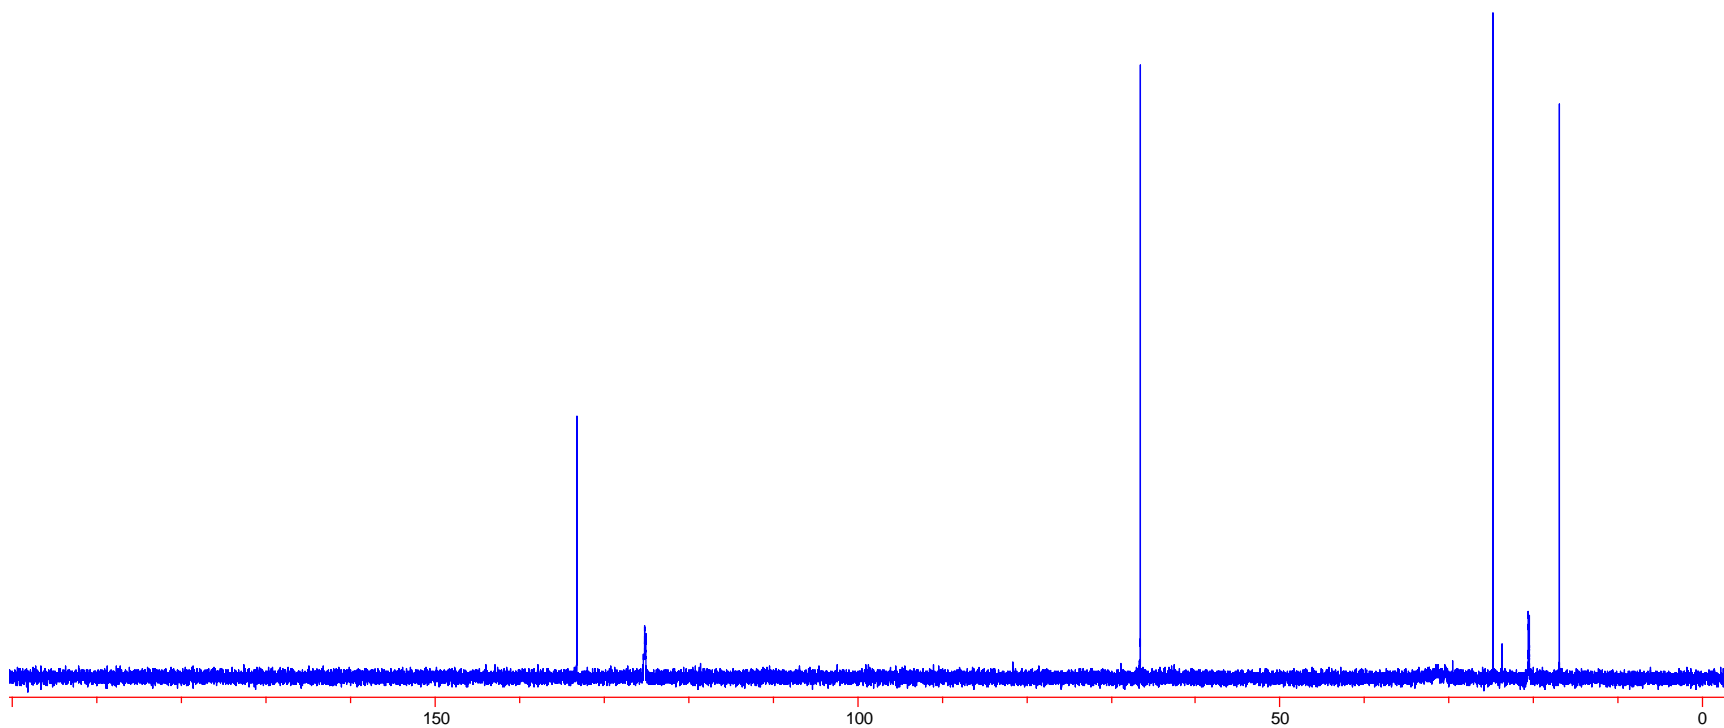

<sup>13</sup>C NMR spectrum of compound **8** (100 MHz).

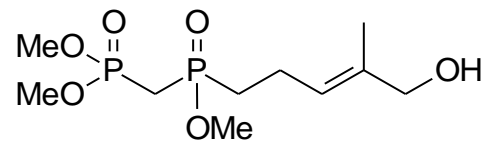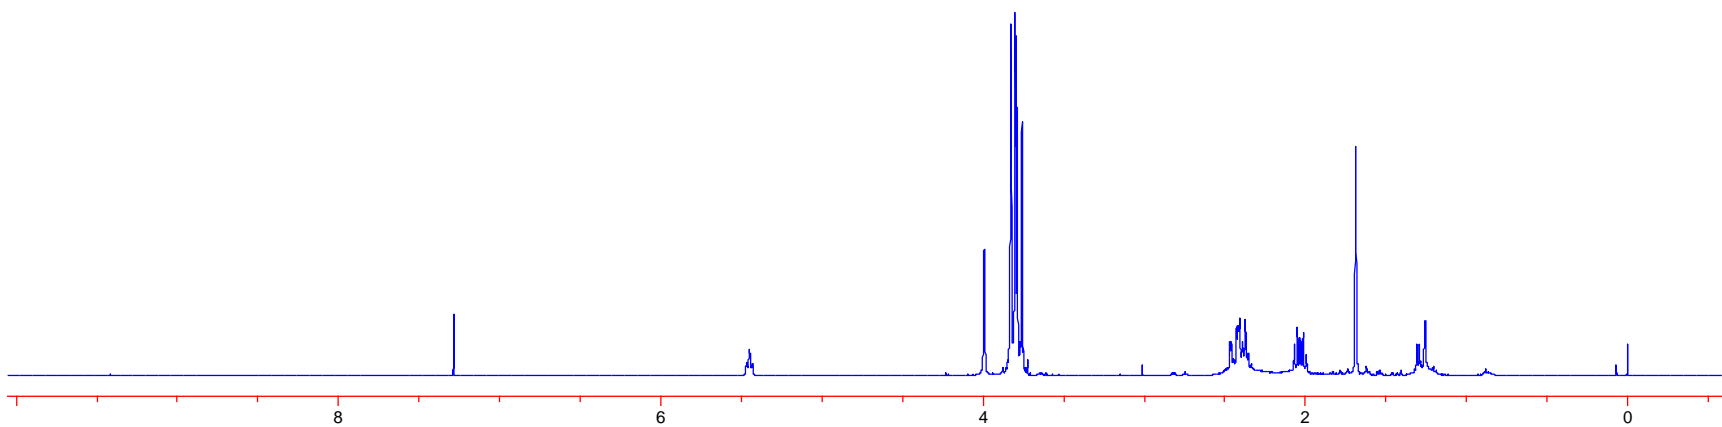

<sup>1</sup>H NMR spectrum for compound **9** (400 MHz).



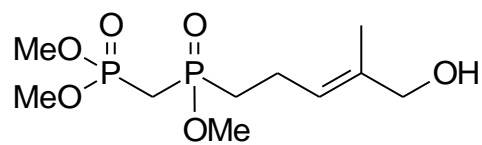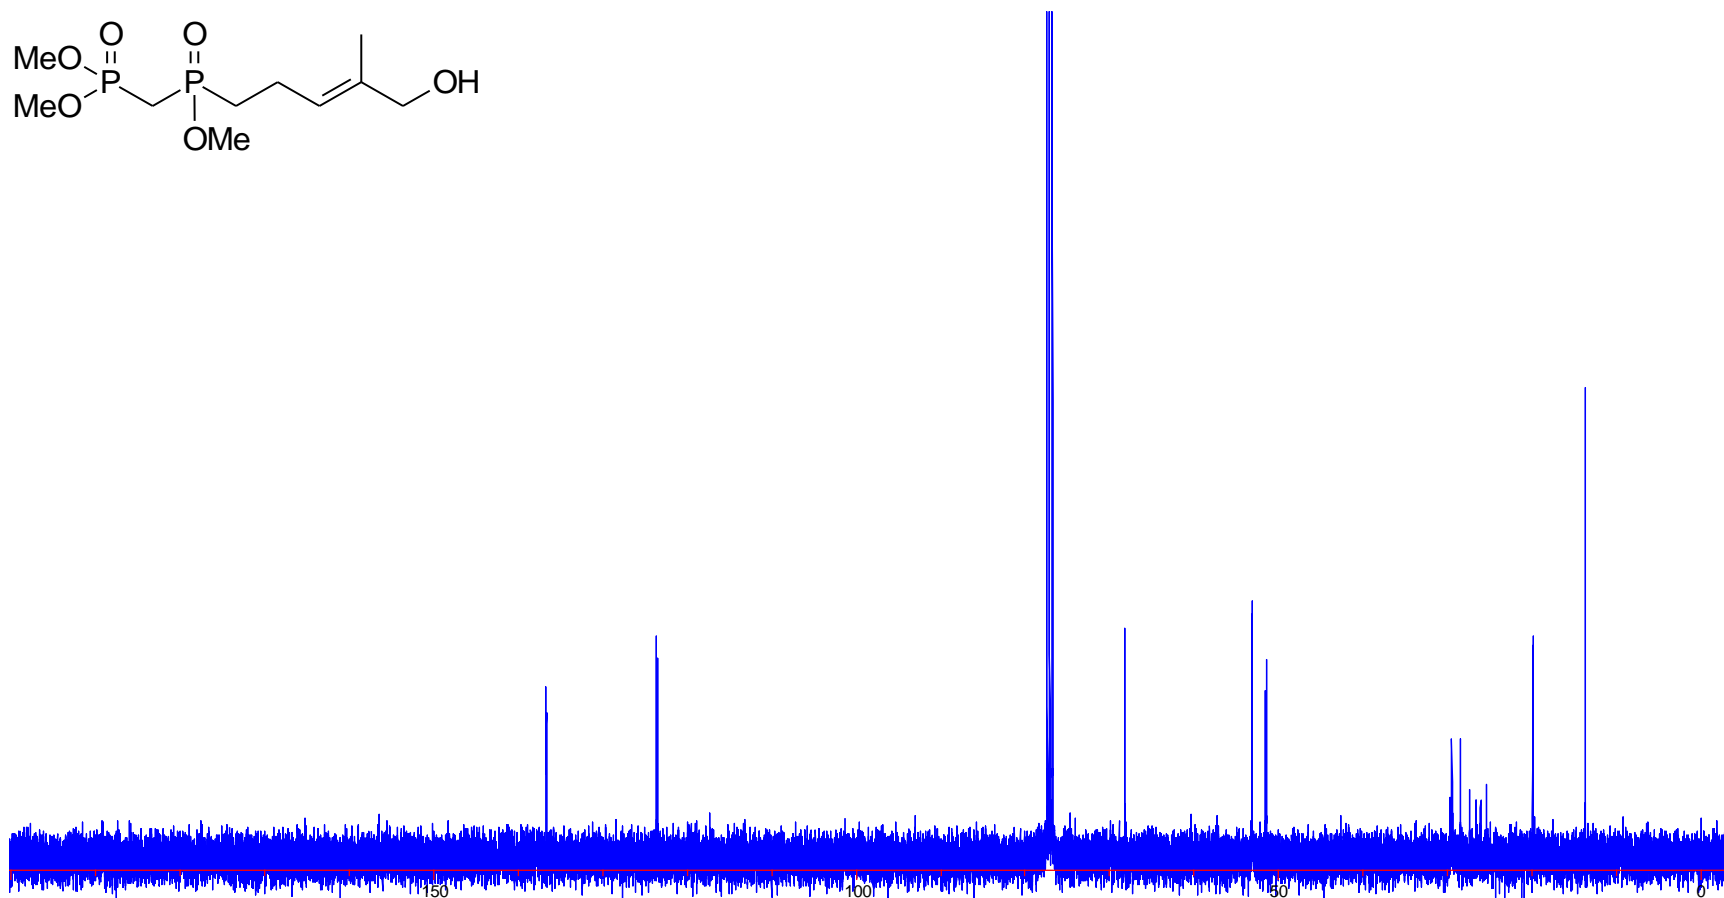

$^{13}\text{C}$  NMR spectrum for compound **9** (100 MHz).

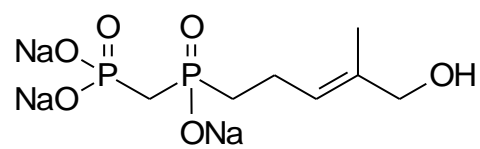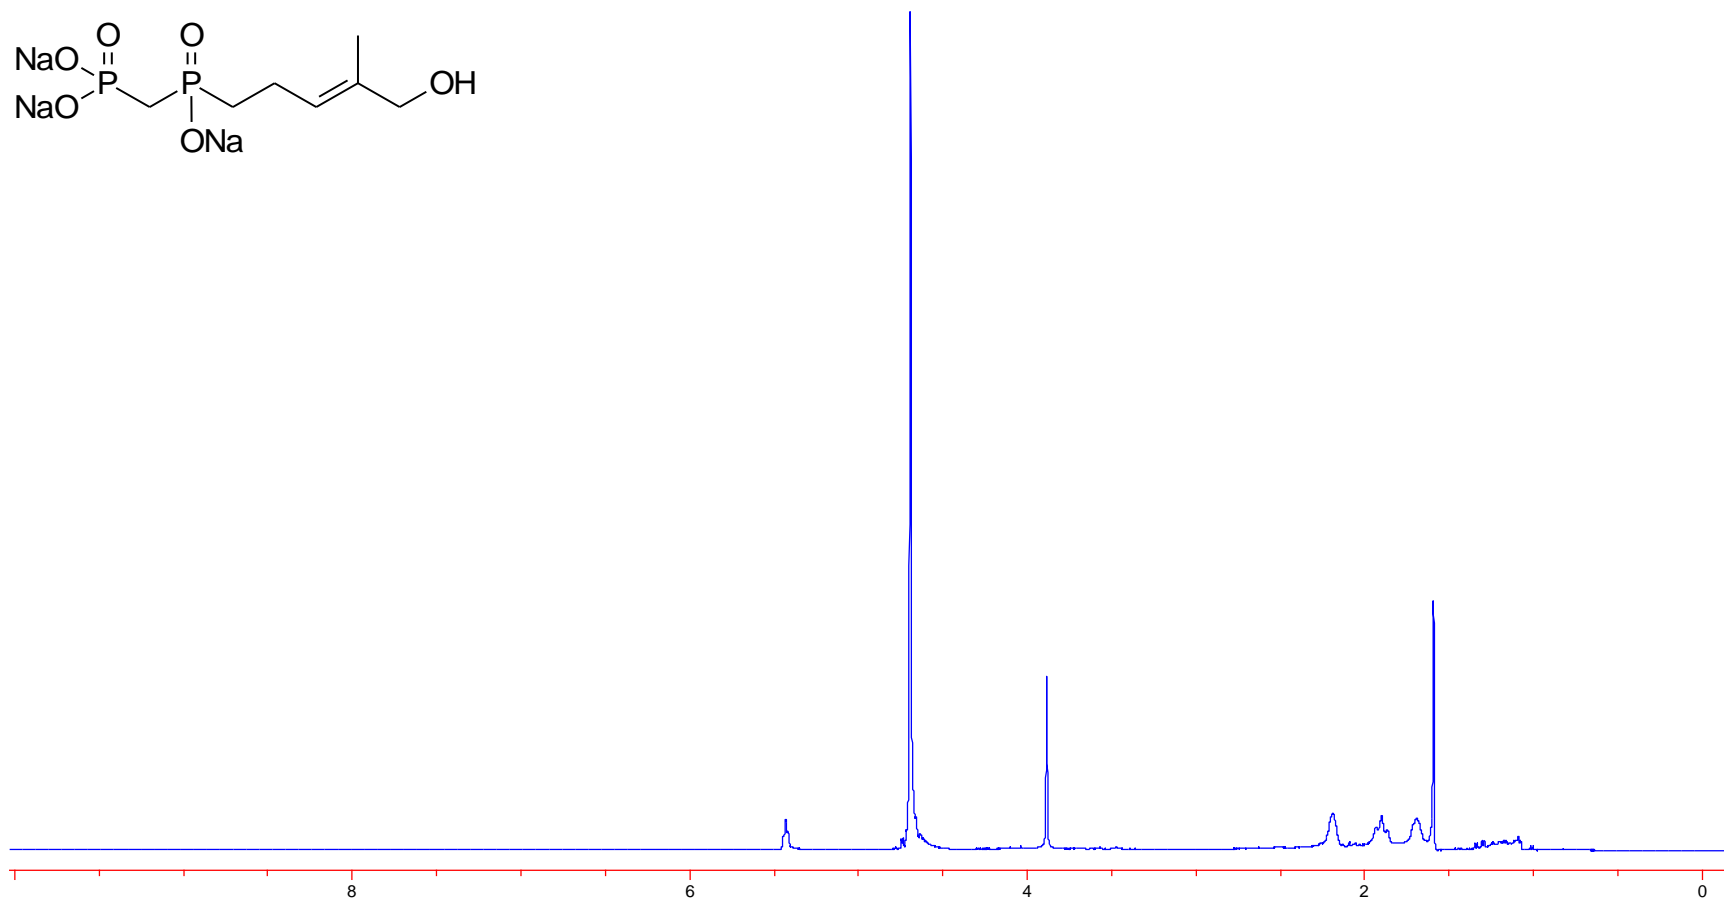

Figure A- 1.  $^1\text{H}$  NMR spectrum of compound **10** (400 MHz).

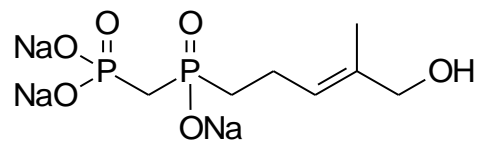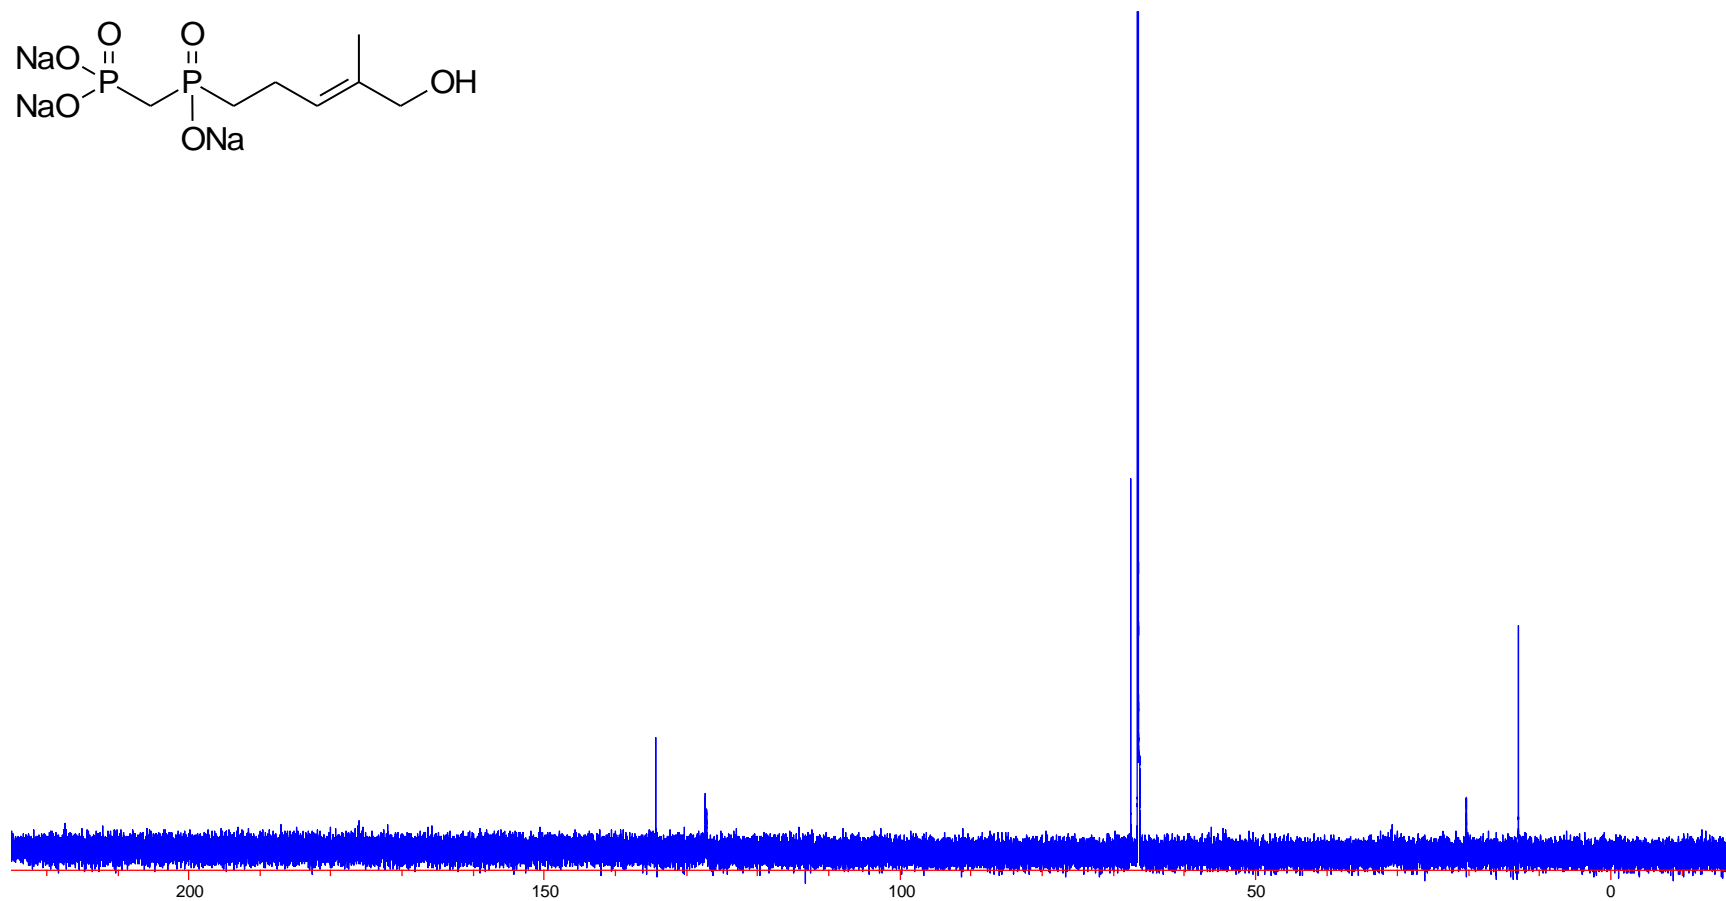

$^{13}\text{C}$  NMR spectrum of compound **10** (125 MHz).

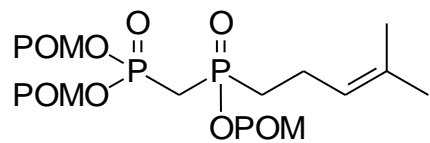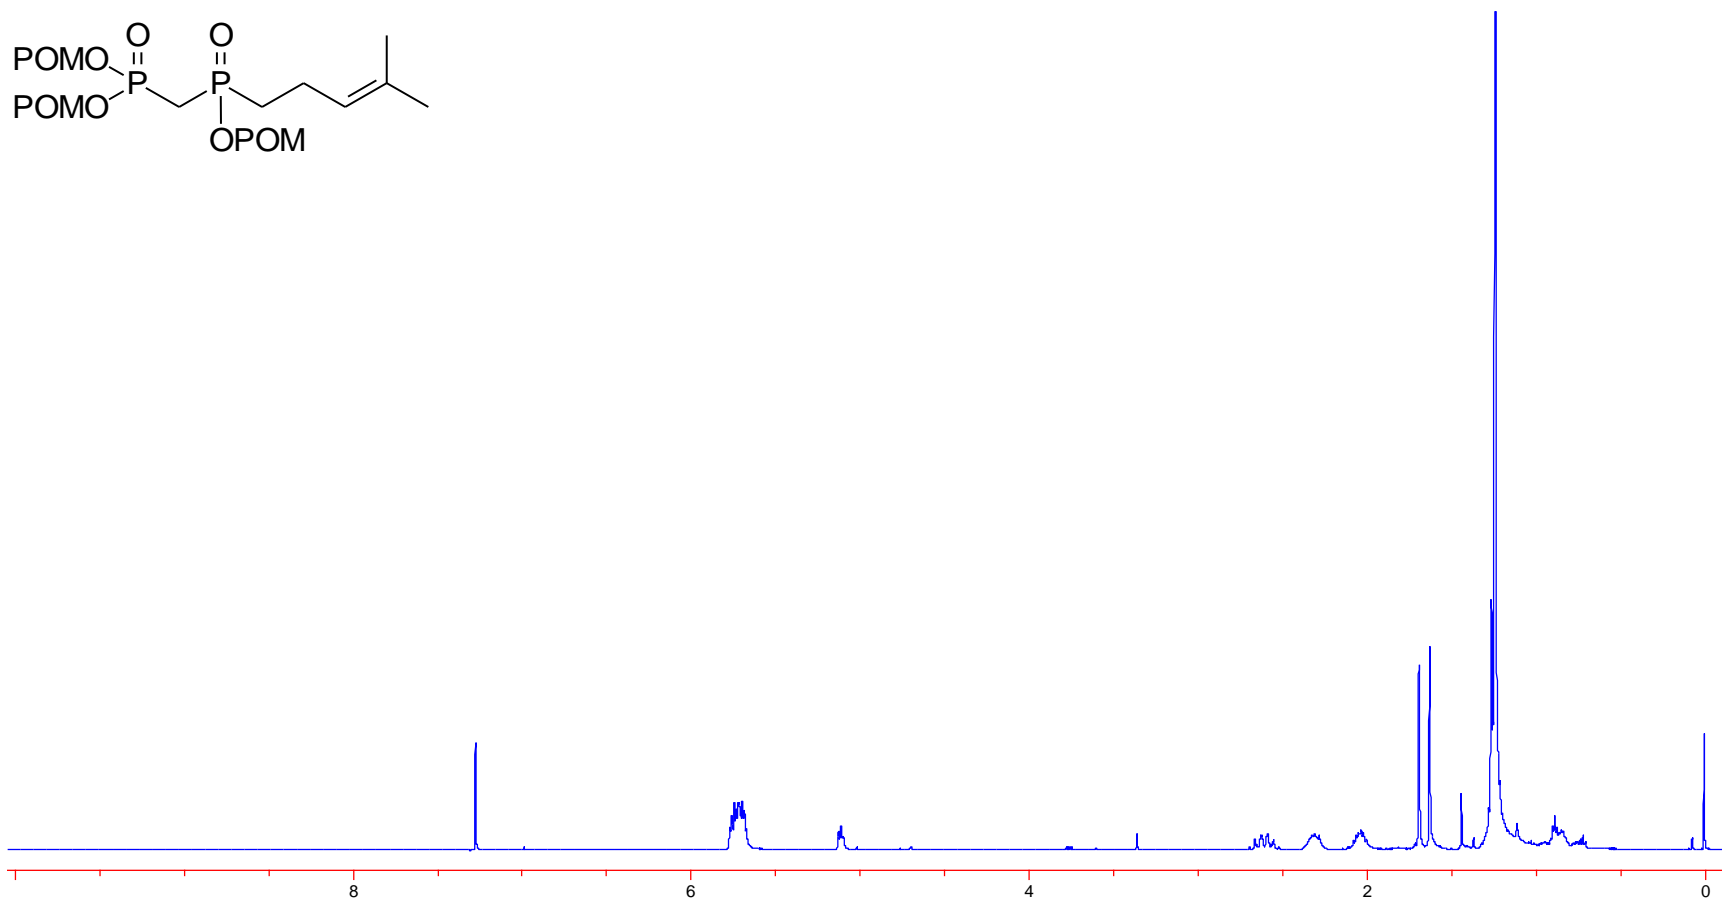

<sup>1</sup>H NMR spectrum of compound **11** (300 MHz).

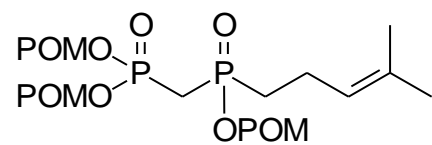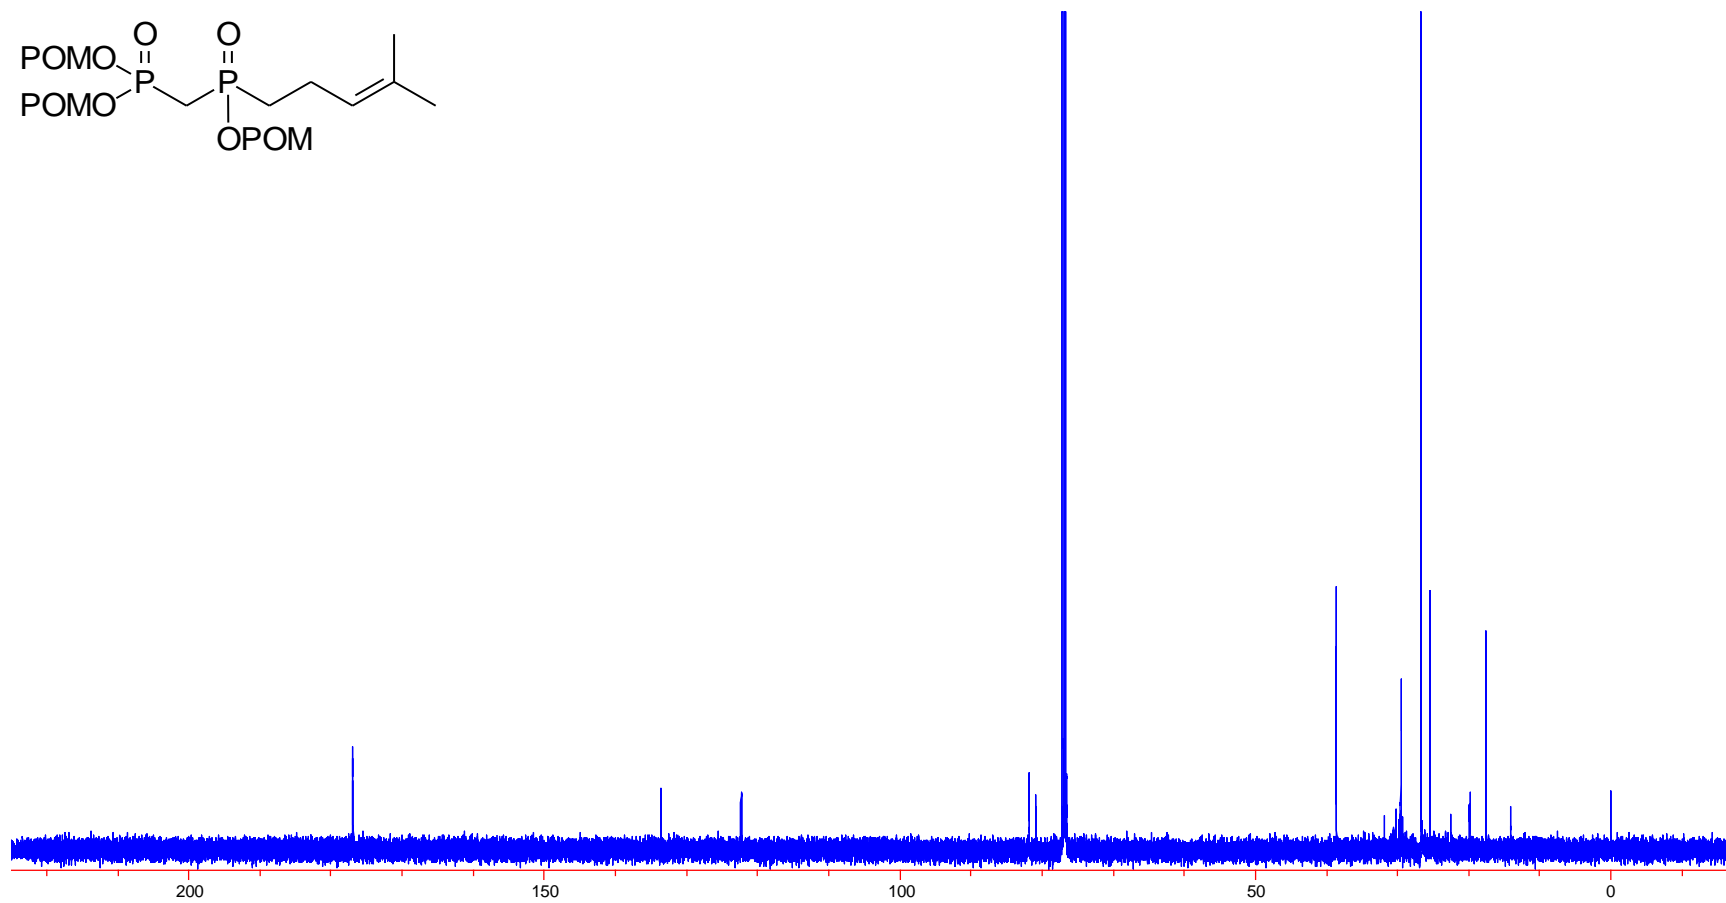

$^{13}\text{C}$  NMR spectrum of compound **11** (75 MHz).
